# Supplementary material for: Quantification of oil and gas methane emissions in the Delaware and Marcellus basins using a network of continuous tower-based measurements
Source: Copernicus journal article supplement (doi:10.5194/acp-23-6127-2023), 2023-06-06
Supplement: Supplementary file 1 [file acp-23-6127-2023-supplement.pdf]

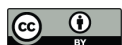

*Supplement of*

## **Quantification of oil and gas methane emissions in the Delaware and Marcellus basins using a network of continuous tower-based measurements**

**Zachary Barkley et al.**

*Correspondence to:* Zachary Barkley (zrb5027@psu.edu)

The copyright of individual parts of the supplement might differ from the article licence.

## 1 S1. Inversion Sensitivity Analysis

To estimate emissions using the Bayesian inversion described in Section 2.5, numerous decisions are made that can affect the resulting posterior solution. In this sensitivity analysis we explore adjusting different parameters and the consequences these choices have on the resulting posterior emissions map. These changes include adjustments to the prior flux magnitude, adjustments to the uncertainty of the prior flux, adjustments to the error correlation length scale, changes to the hours which define the afternoon period, and changes to how the background tower is defined. A final sensitivity test examining the inversion's sensitivity to non-O&G sources is performed specifically for the PADEP prior, where non-O&G sources contribute to nearly half of the prior inventory in the study area. These changes are described in further detail below, and results can be found in Tables S2-S5 as well as in Figure 3 of the main manuscript.

Adjusting the magnitude to the prior can help to determine how much the total of the posterior solution is being pre-determined by its prior. In an ideal scenario, three priors with similar spatial structures but different magnitudes would converge to a similar posterior solution. However, transport uncertainties or insufficient influence function coverage can result in a posterior emission map that still contains characteristics of the prior's flux magnitude. In this test, an inversion is run for each prior, adjusting its magnitude by 50% and 150% to see the level of convergence between the posterior magnitudes. For this experiment, the error covariance matrix is doubled from its original value in both cases to give the inversion the flexibility to shift heavily from the prior, as the prior itself no longer represents a best estimate of the truth. In the Delaware basin, using the  $EI_{ME}$  prior at 50% and 150% (88 and 264 Mg/hr) produces mean posterior solutions of 146 (+58) and 210 (-54) Mg/hr respectively, showing some but not total convergence to the value of 174 Mg/hr using the original prior. In the Marcellus using the Production-based prior at 50% and 150% (12 and 37 Mg/hr) produces mean posterior solutions of 19 (+7) and 26 (-11) Mg/hr respectively. Interestingly, using the PADEP inventory as a prior (7 Mg/hr), both the 50% and 150% solutions (16 and 19 Mg/hr) converge to values above the 150% prior, strongly indicating that the PADEP prior is far too low and as a consequence may be biasing the posterior solutions with it.

Adjustments to the correlation length scale of the prior flux and adjustments to the uncertainty of the prior flux are both ways of changing the structure of the error covariance matrix used in the inversion to solve for a posterior flux. Here, we experiment with adjusting the correlation length, running an inversion using a length of 10 km. By increasing the correlation length, it forces the inversion to move large sections of the posterior solution towards the same relative change in the flux. resulting in an inversion more

47 inclined to solve for the mean change across the basin and less capable of attempting to  
48 solve for small scale changes. Additionally, increasing the correlation length allows the  
49 inversion to adjust grids on the outskirts of the domain where footprint coverage may  
50 be less prevalent. In both the Delaware and Marcellus inversions, solutions using the 10  
51 km correlation length were similar in magnitude and performance to their 5 km coun-  
52 terparts, indicating that the selection of reasonable correlation length has little impact  
53 on our overall posterior solutions.

54 In addition to adjusting the correlation length, we also run an inversion scenario  
55 where the flux error matrix is doubled. This gives the posterior solution the ability to  
56 stray further from the prior and achieve a posterior solution that matches more closely  
57 with the observations, but can result in an underconstrained solution and create unre-  
58 realistically high or negative flux values to achieve the optimal match with observations,  
59 underweighting noise related to transport errors. In both the Delaware and Marcellus  
60 inversions, doubling the flux error matrix produces solutions with minor improvements  
61 to the obs-model statistical comparisons relative to the default posterior solution, but  
62 with similar total fluxes.

63 Throughout the study, afternoon hours are defined as 20-23 UTC in the Delaware  
64 and 18-21 UTC in the Marcellus. These hours are selected based on the time within the  
65 transport model when boundary layer heights are at their peak and have stabilized (Fig-  
66 ure S4), providing more confidence in the overall solution as mismatches in timing of the  
67 boundary layer development in the model compared to reality would have minimal im-  
68 pacts on the projected size of the enhancements. However, theoretically the tower ob-  
69 servations are measuring enhancements from the study domain mixed within the bound-  
70 ary layer at earlier times as well, even if the boundary layer is still developing. In the  
71 Early scenario, we expand the hours included in the afternoon definition to 16-23 UTC  
72 in the Permian and 14-21 UTC in the Marcellus. In both the Delaware and Marcellus  
73 inversions, using the early hour data produces posterior solutions that statistically per-  
74 form slightly worse than the default posterior, but have similar total emissions.

75 In the default inversion, the observed enhancement is calculated by subtracting off  
76 a background value based on the tower(s) that have the lowest mole fraction, or have  
77 the smallest model enhancement. The main advantage of this method is that the tower(s)  
78 selected are most likely to be clean of contamination from local sources that could cre-  
79 ate errors in estimating the background of the air mass entering the model domain. How-  
80 ever, the tower(s) selected may not lie directly upwind of the towers downwind of the  
81 O&G sources, and could at times be representative of an air mass different from those  
82 downwind towers. To account for this, an alternative background tower selection method  
83 is performed, selecting the tower directly upwind of the O&G sources based on the mean  
84 afternoon wind direction. In both the Delaware and the Marcellus, this alternative back-  
85 ground selection produces a posterior solution that statistically performs substantially  
86 worse than the default selection in terms of the mean absolute error and correlation be-  
87 tween model and observations and overall has a marginally lower emissions total. De-  
88 spite the worse statistical performance of the alternative background posteriors, the over-  
89 all bias between the model and observed enhancements is closer to 0 in all alternative  
90 background posterior solutions. This result is contrary to the default inversion poste-  
91 riors which all maintain a negative bias (model enhancements larger than observations)  
92 and may indicate that the default background methodology results in a background that  
93 is too low, artificially creating enhancements at downwind tower sites that the inversion  
94 is not able to reconcile. Regardless of this discrepancy, both background selections pro-  
95 duce posterior emission rates that are within 15% of each other for all prior inventories.

96 One of the major assumptions in the inversions performed in this study is that the  
97 non-O&G sources are well-known, allowing us to subtract them from the background and  
98 attribute all changes from the prior to the posterior solve exclusively to O&G sources.  
99 For the Delaware basin the O&G emissions dominate relative to non-O&G sources, mak-

100 ing the assumption of accuracy with the non-O&G sources low risk. However, in the PADEP  
101 prior of the northeast Marcellus basin, the non-O&G anthropogenic sources in the in-  
102 ventory contribute to nearly the emissions in the study domain (Figure S9). While pre-  
103 vious studies have found the PADEP’s O&G inventory to be unrealistic, here we per-  
104 form a test as part of the sensitivity analysis allowing for the inversion to solve for all  
105 anthropogenic sources to see how the inversion would distribute the emissions in the pos-  
106 terior in a scenario where the non-O&G sources were designated to be as uncertain as  
107 the the O&G sources. For this experiment, non-O&G enhancements are not subtracted  
108 from the background calculation, and their emissions in the prior are given an uncertainty  
109 value equal to 350% the magnitude of their prior (the same percentage used for O&G  
110 in the PADEP prior). The inversion is run and a posterior is generated. Changes in the  
111 emissions from the prior to the posterior are attributed to O&G or non-O&G based on  
112 their fractional distribution in the prior. For example, a grid which changed  $10 \text{ mol hr}^{-1}$   
113 and contained 90% O&G in the prior would have  $9 \text{ mol hr}^{-1}$  attributed to O&G. The  
114 resulting O&G emissions from this sensitivity test are similar to the default posterior,  
115 with total O&G emissions being only 8% less (Table S5). The lack of sensitivity to non-  
116 O&G sources is expected, as these emissions mostly originate from large point source  
117 landfill emitters spatially uncorrelated with the gas activity within the domain, such that  
118 few days would have influence functions overlapping both large amounts of O&G and  
119 non-O&G sources.

## 120 2 S2. Detailed Background Sensitivity Analysis

121 In this section we examine the effects various background selection methods have  
122 on the posterior flux and the skill of the model dataset relative to the observations. A  
123 total of 6 different selection methods are tested, described below.

124 -Minimum Tower: The background tower is selected based on the tower with the  
125 lowest observed afternoon methane mole fraction.

126 -Minimum Tower (no model subtraction): The background tower is selected based  
127 on the tower with the lowest observed afternoon methane mole fraction. However, in this  
128 case, the modeled methane enhancements are not subtracted off of the background. This  
129 method assumes that the tower with the lowest observed methane values should not be  
130 heavily influenced by sources within the model domain, and that zeroing any model en-  
131 hancements at the tower site eliminates the possibility of further reducing the background  
132 value due to errant plumes within the model.

133 -Minimum Model: The background tower is selected based on the tower with the  
134 lowest **modeled** afternoon methane enhancement.

135 -Hybrid: The background value is selected by averaging the results of the minimum  
136 tower methods and the minimum model method. This is the method used in the "de-  
137 fault" inversion.

138 -Hybrid Filter: The background value is selected by averaging the results of the min-  
139 imum tower methods and the minimum model method. If the resulting background value  
140 using each of the two methods is not within 10 ppb, the day is not used in the inversion.

141 -Upwind: The background value is selected based on the tower or towers that are  
142 most directly upwind of the O&G basin using the afternoon mean wind direction.

143 Tables S7-S8 show summaries of the results using each one of these background meth-  
144 ods for each basin. In both basins, the Hybrid and Hybrid Filter approaches produce the  
145 best overall posterior results, with low mean absolute errors and high correlations be-  
146 tween model and observations, and more consistent background values in a 15 day mov-  
147 ing std test. Though the Hybrid Filter approach performs better than the Hybrid ap-

148 proach used as the default method in the inversion, this method comes at the cost of elim-  
149 inating data on days with complex background conditions (30% in the Delaware and 41%  
150 in the Marcellus). This should not be considered a strictly negative outcome, as includ-  
151 ing days in which the background is poorly understood could adversely affect the accu-  
152 racy of the dataset and resulting posterior solutions. In this study though, both the Hy-  
153 brid and Hybrid Filter produce similar total emissions for both basins. Of the remain-  
154 ing methods, none perform consistently well statistically across both basins.

155 Figure S23 shows how each background methodology affects the temporal timeseries  
156 of posterior emission rates. Generally, the background methodology selected will change  
157 the overall magnitude of the emission rate but not affect the trendline. It is important  
158 to note that each of these solutions should not be considered equally plausible. For ex-  
159 ample, the Minimum Tower method would be expected to produce a background that  
160 is biased low (and thus an emission rate that is biased high) and the Minimum Model  
161 method would produce an background that is biased high (and thus an emission rate that  
162 is biased low) as discussed in the main text.

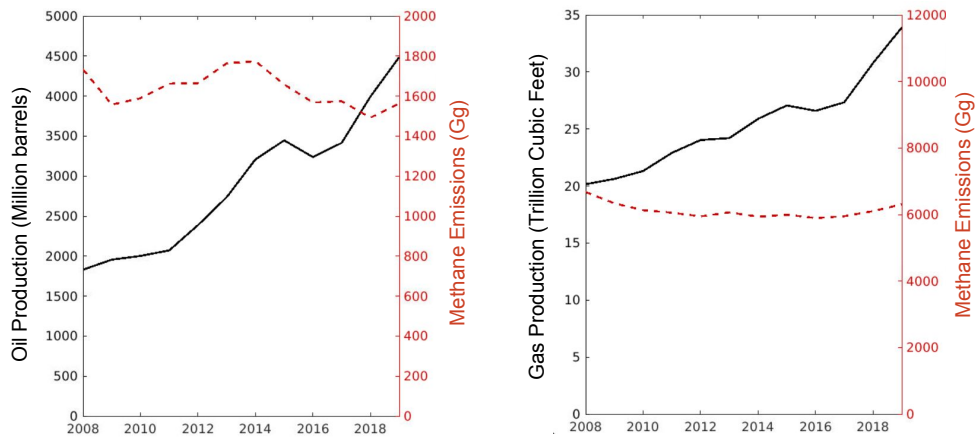

**Figure S1.** (left) U.S. annual oil production in black, with EPA bottom-up inventory emission estimates of methane emissions from the petroleum sector in red. (right) U.S. annual natural gas production in black, with EPA bottom-up inventory estimates of methane emissions from the natural gas sector in red.

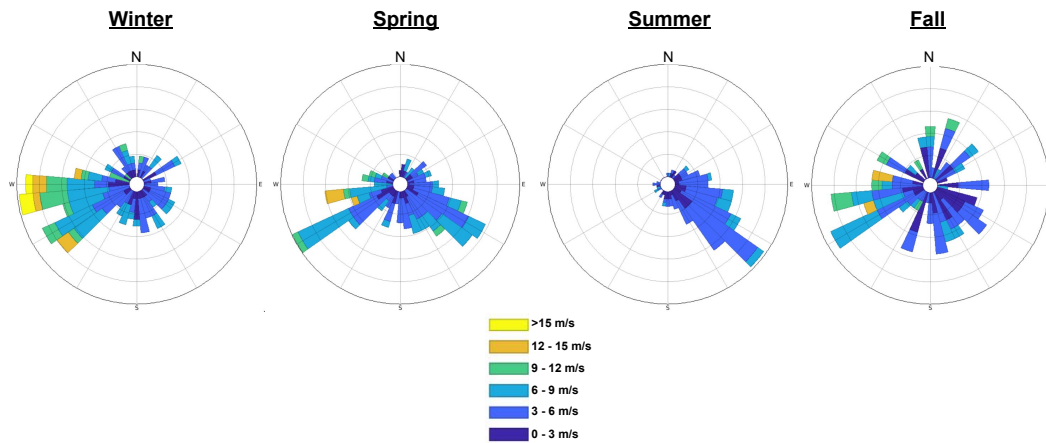

**Figure S2.** A wind rose for the Delaware basin showing the speed and frequency of afternoon winds by season. Wind data is 100 m AGL from the WRF-Chem model simulation averaged over the study domain.

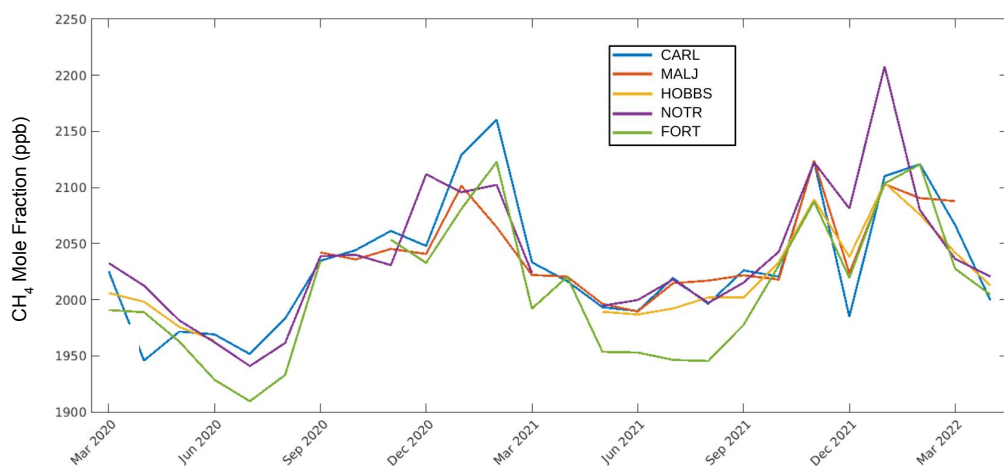

**Figure S3.** Monthly means of observed afternoon methane mole fractions (20-23 UTC) from the Delaware basin tower network from March 2020 through April 2022.

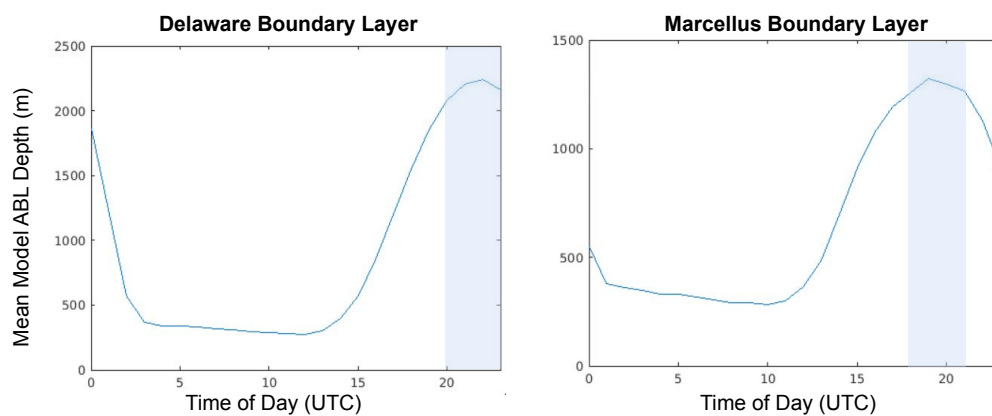

**Figure S4.** Average model boundary layer depths in the Delaware and Marcellus basins based on time of day. The shaded area on each graph represents the time period used for the afternoon-averaged observations in the study

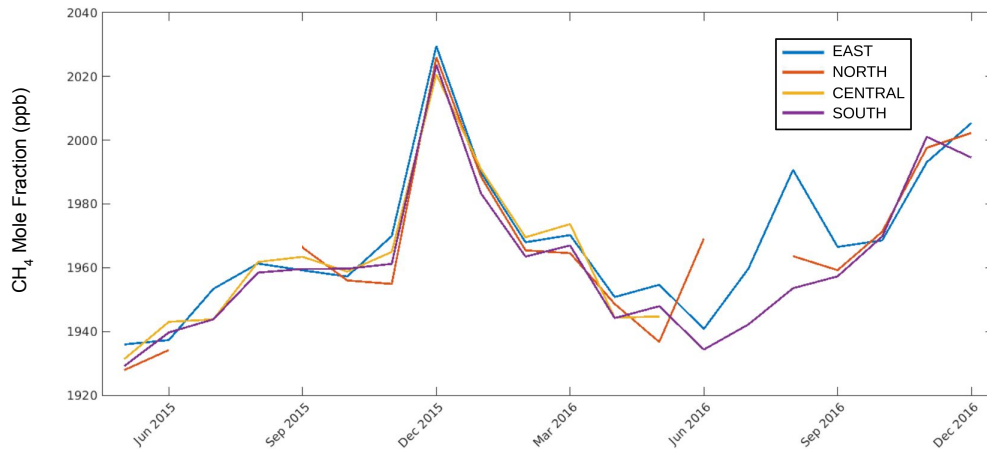

**Figure S5.** Monthly means of observed afternoon methane mole fractions (18-21 UTC) from the Marcellus basin tower network from May 2015 through December 2016.

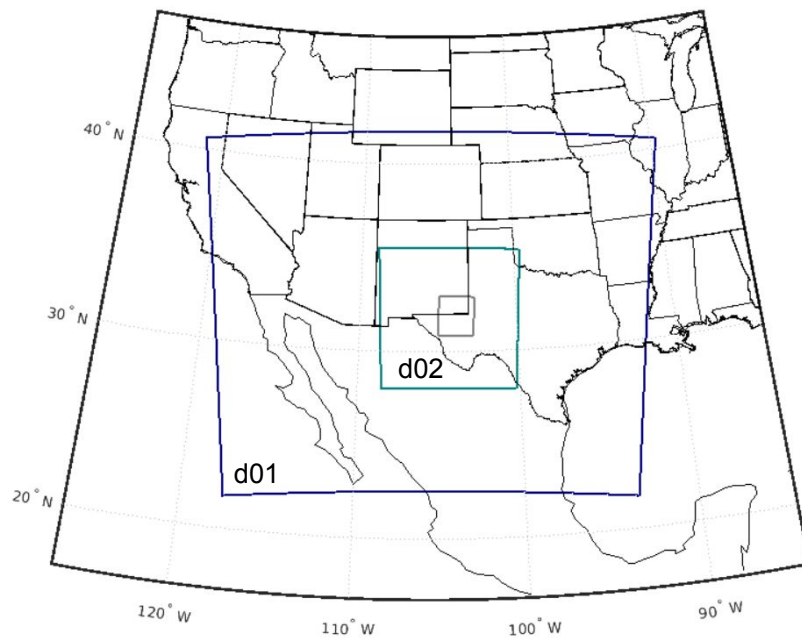

**Figure S6.** A map of the 9 km and 3 km model domain used to generate meteorology for influence functions in the Delaware tower analysis, with the study domain illustrated within the 3 km model domain.



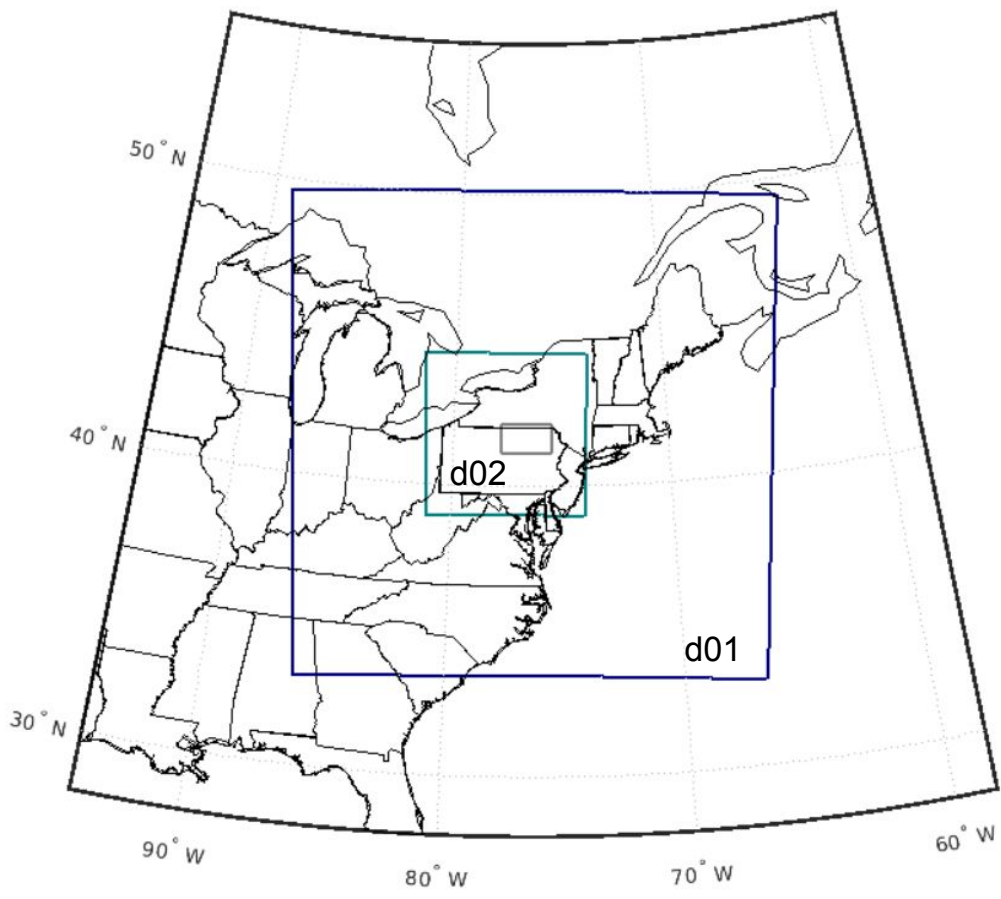

**Figure S7.** A map of the 9 km and 3 km model domain used to generate meteorology for influence functions in the northeastern Marcellus tower analysis, with the study domain illustrated within the 3 km model domain.

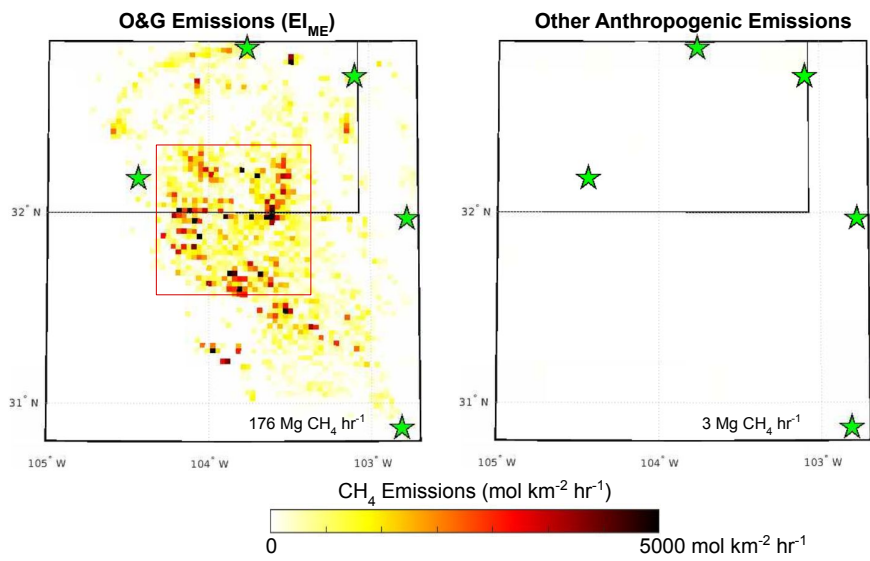

**Figure S8.** A comparison between O&G and non-O&G anthropogenic emissions in the Delaware study area

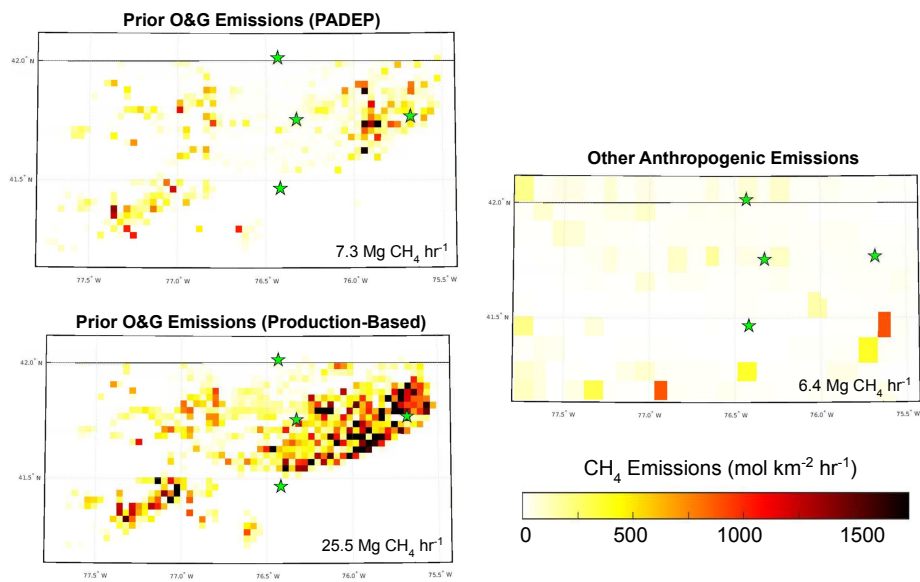

**Figure S9.** A comparison between O&G and non-O&G anthropogenic emissions in the Marcellus study area. The left

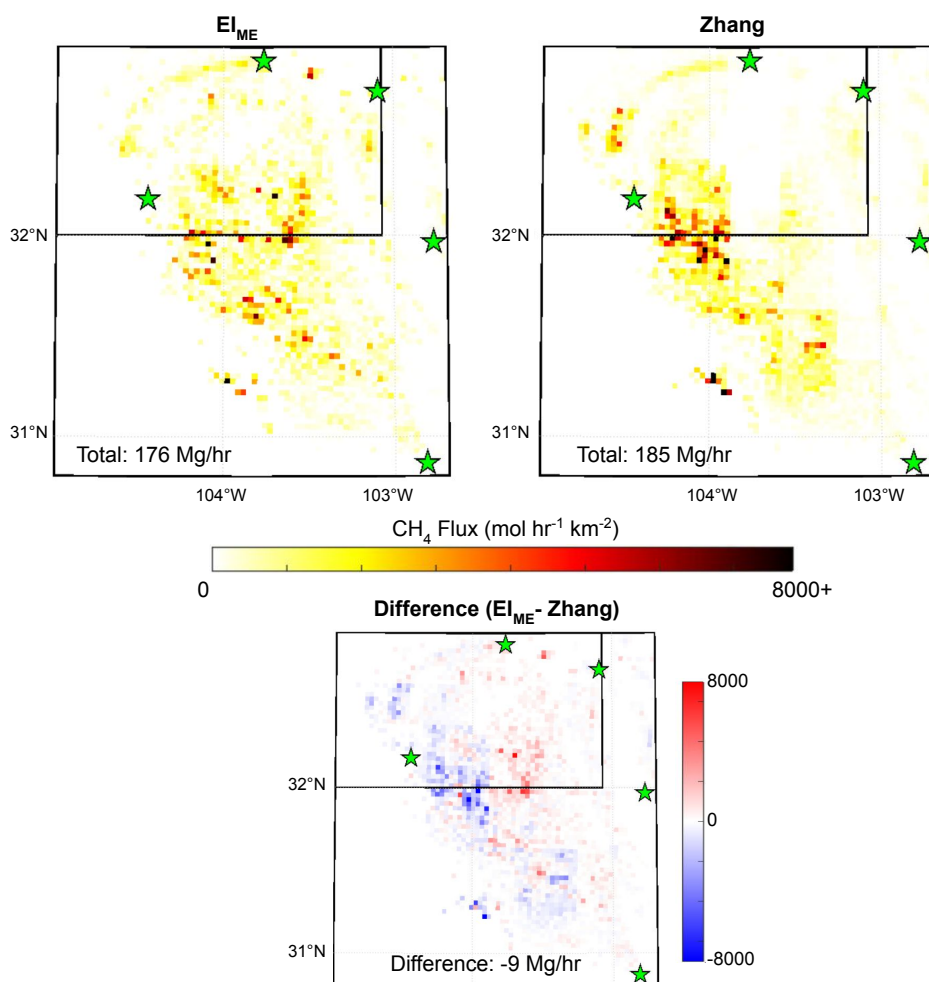

**Figure S10.** A comparison between O&G emissions from the two priors used in this study for the Delaware basin. (left) The  $EI_{ME}$  emission map constructed from site-level data and used in Zhang et al. (2020). (right) The posterior emission map from Zhang et al. (2020), used as an alternative prior for this study. (bottom) The difference between the two priors.

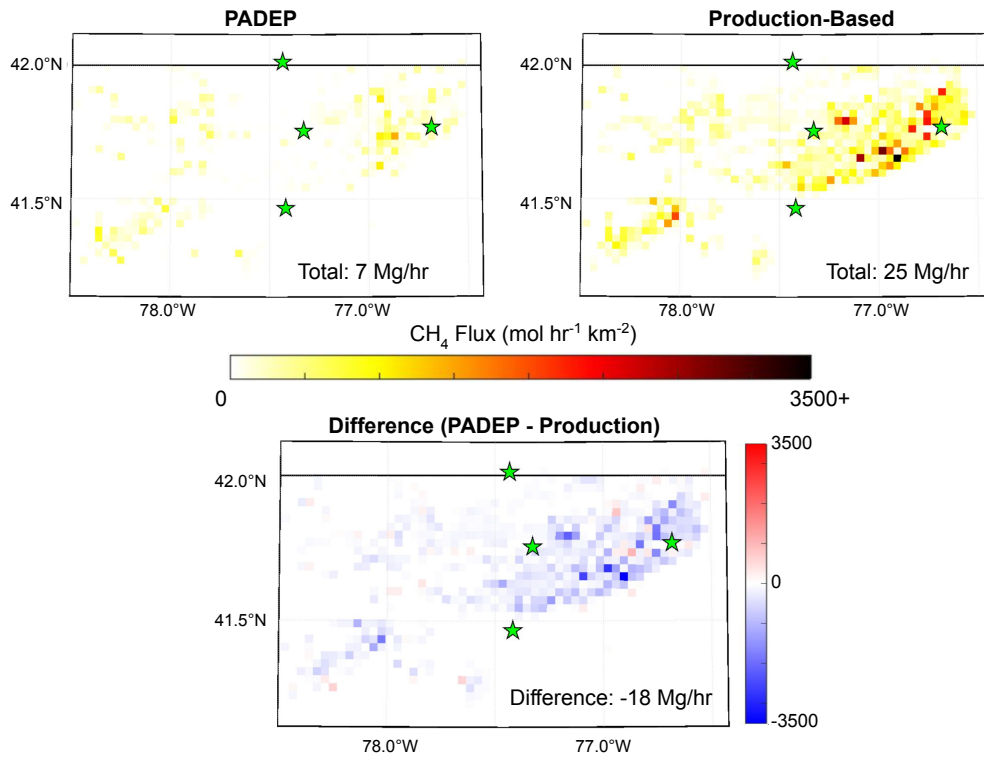

**Figure S11.** A comparison between O&G emissions from the two priors used in this study for the northeast Marcellus basin. (left) An emission map of unconventional natural gas activity constructed by the Pennsylvania Department of Environmental Protection. (right) An alternative emissions map created by taking the annual production of unconventional gas wells during the 2015-2016 time period and assuming a mean emission rate of 0.4% of production. (bottom) The difference between the two priors.

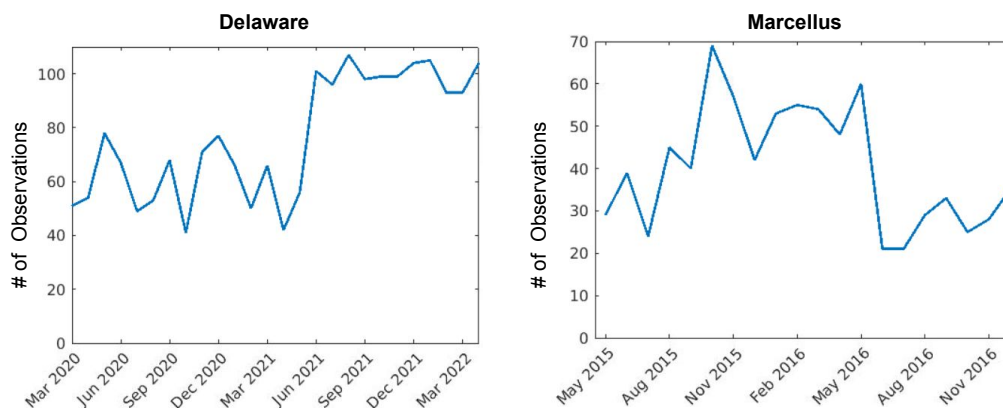

**Figure S12.** Number of afternoon downwind tower observations used in the Delaware and Marcellus inversions for each month

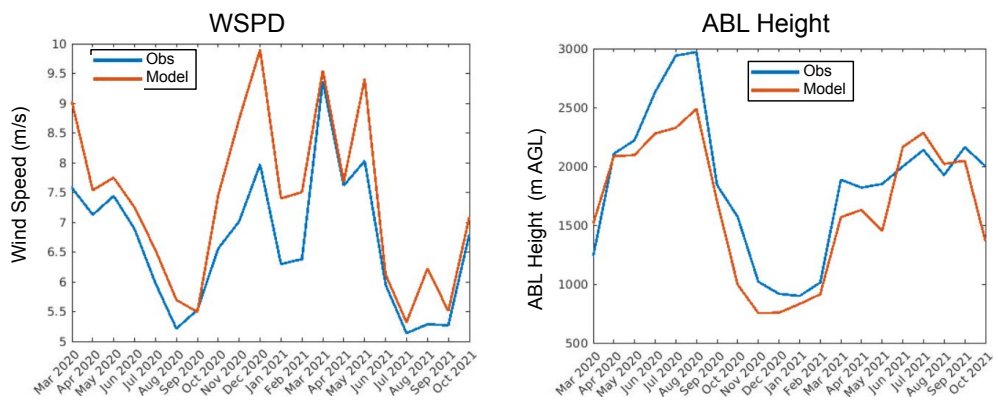

**Figure S13.** Observed vs modeled monthly mean boundary layer wind speeds and boundary layer heights at the location of the radiosonde in Midland, Texas (location: 31.95°N, 102.18°W). Observed and modeled values are taken at 0 UTC

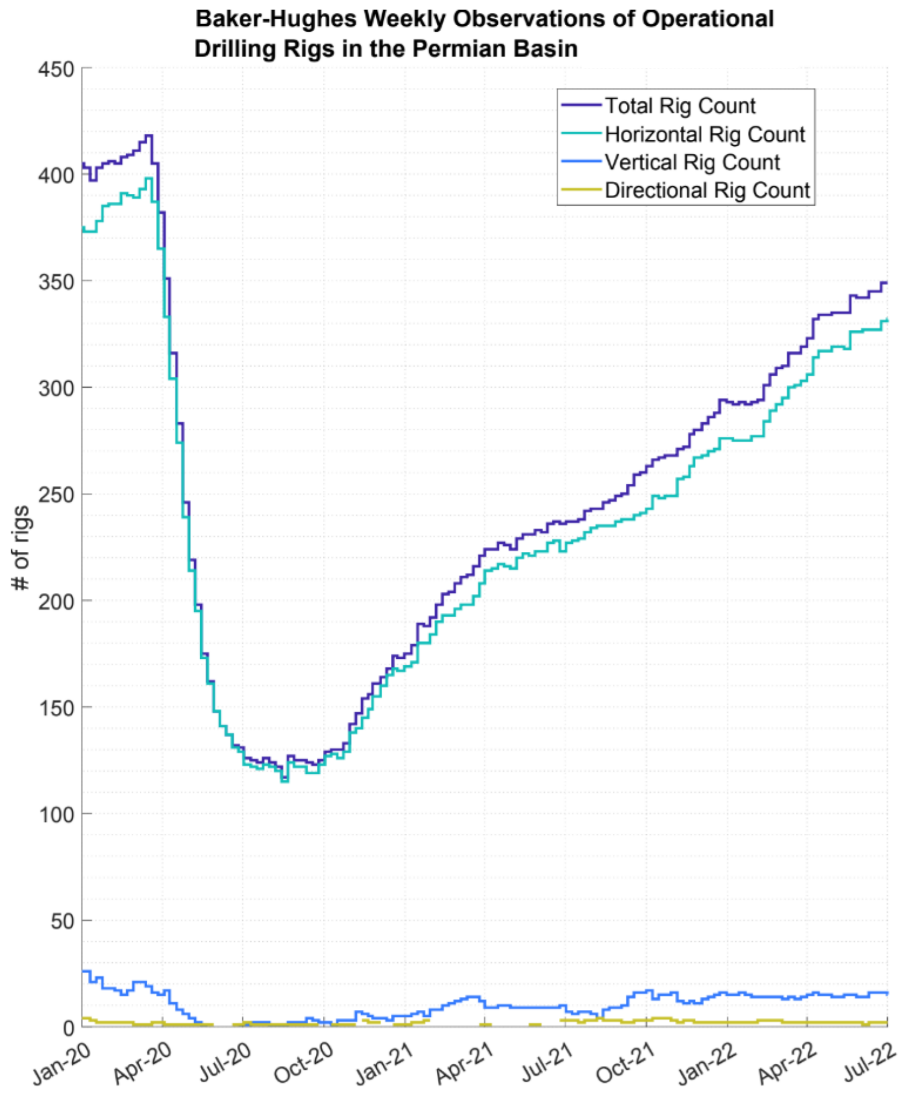

**Figure S14.** Rigs count in the Permian basin based on data from Baker Hughes (<https://rigcount.bakerhughes.com/na-rig-count>).

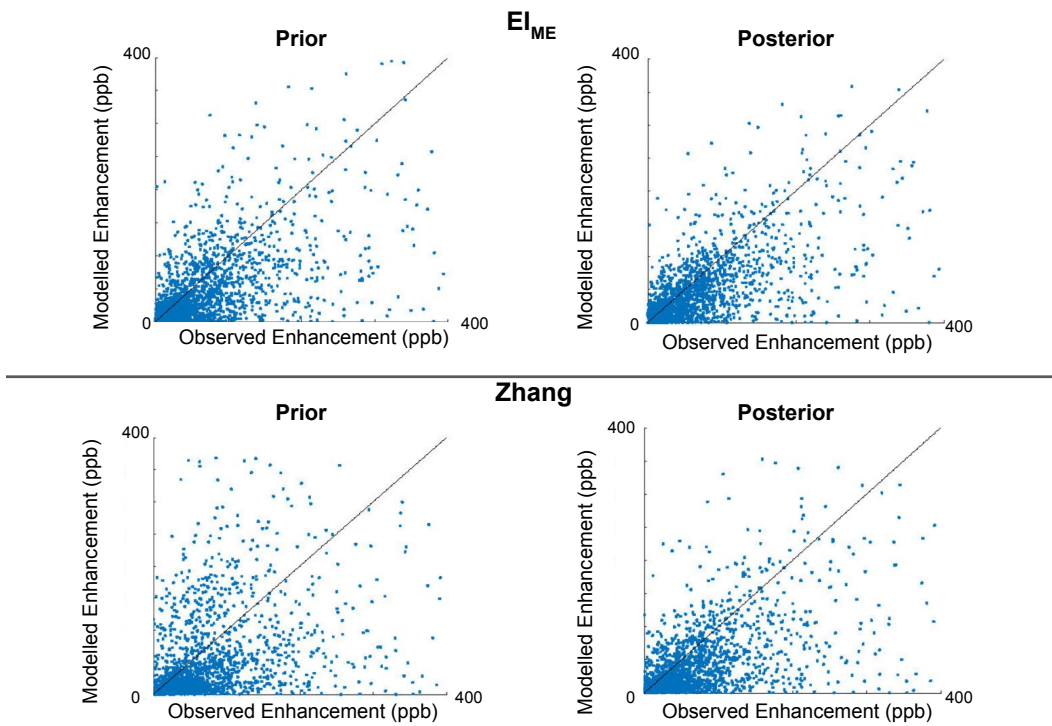

**Figure S15.** (top) A comparison of modeled vs observed O&G methane enhancements for the Delaware based on the  $EI_{ME}$  prior and monthly posterior emission maps. (bottom) Similar to top, but using the Zhang prior and monthly posterior emission maps. The black line on all plots is the identity line.

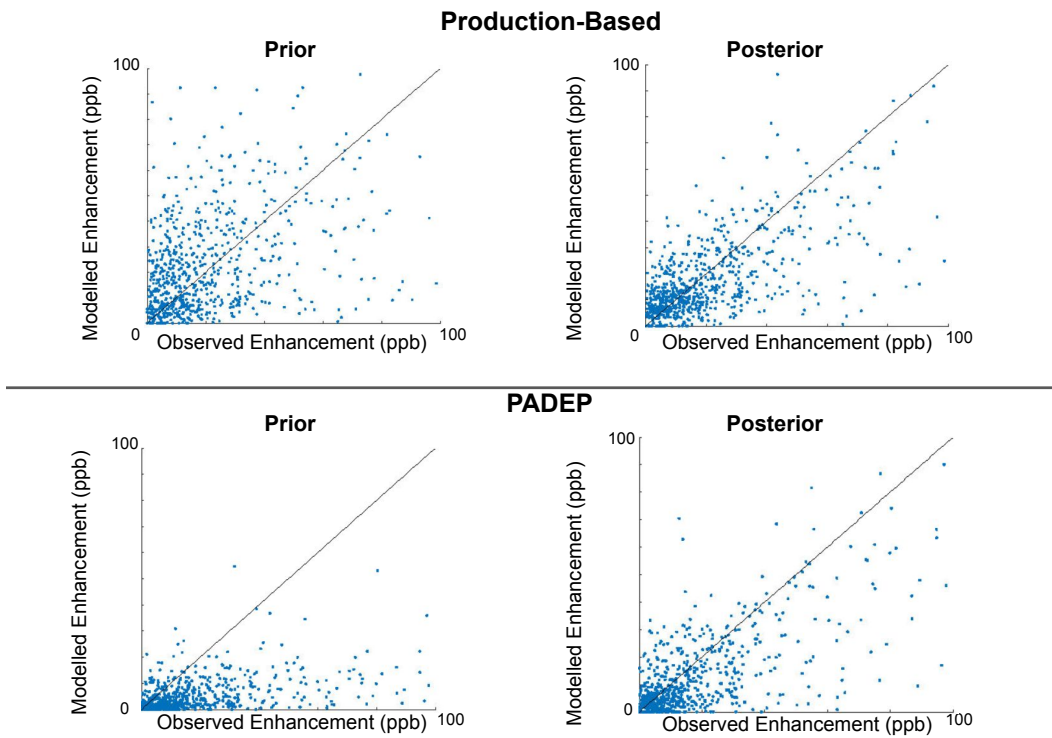

**Figure S16.** (top) A comparison of modeled vs observed O&G methane enhancements for the Marcellus based on the Production-based prior and monthly posterior emission maps. (bottom) Similar to top, but using the PADEP prior and monthly posterior emission maps. The black line on all plots is the identity line.



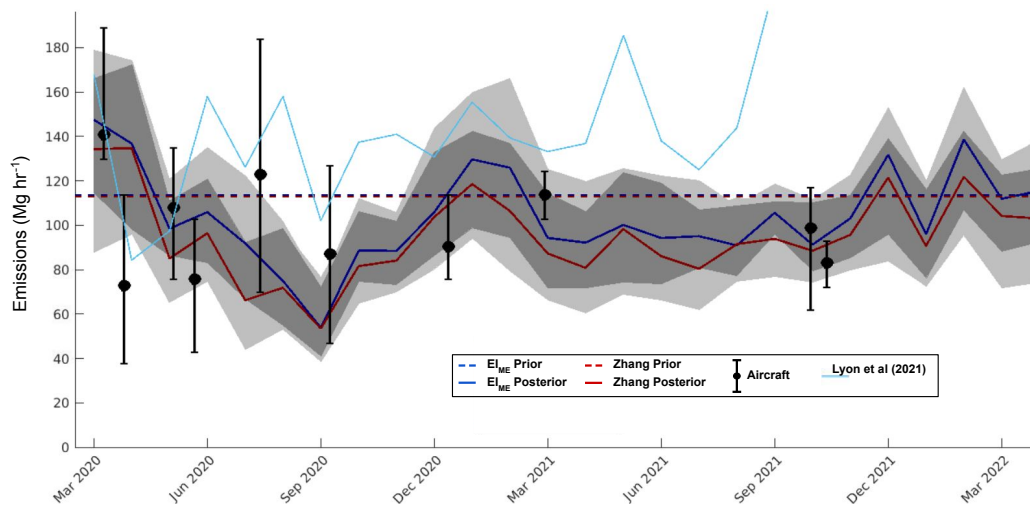

**Figure S17.** Prior and posterior monthly O&G methane emission totals for the 100 x 100 km Delaware domain used in Lyon et al. (2021) based on the  $EI_{ME}$  prior (blue) and Zhang prior from this study (red). The shaded area represents the minimum and maximum emission rate for each month based on the range of results by adjusting the inversion as described in the sensitivity analysis in supplemental section S1. Emission results from the aircraft campaign performed in the same domain from Lyon et al. (2021) are plotted overtop, as are the monthly mean emission estimates using techniques from the tower analysis in Lyon et al. (2021)

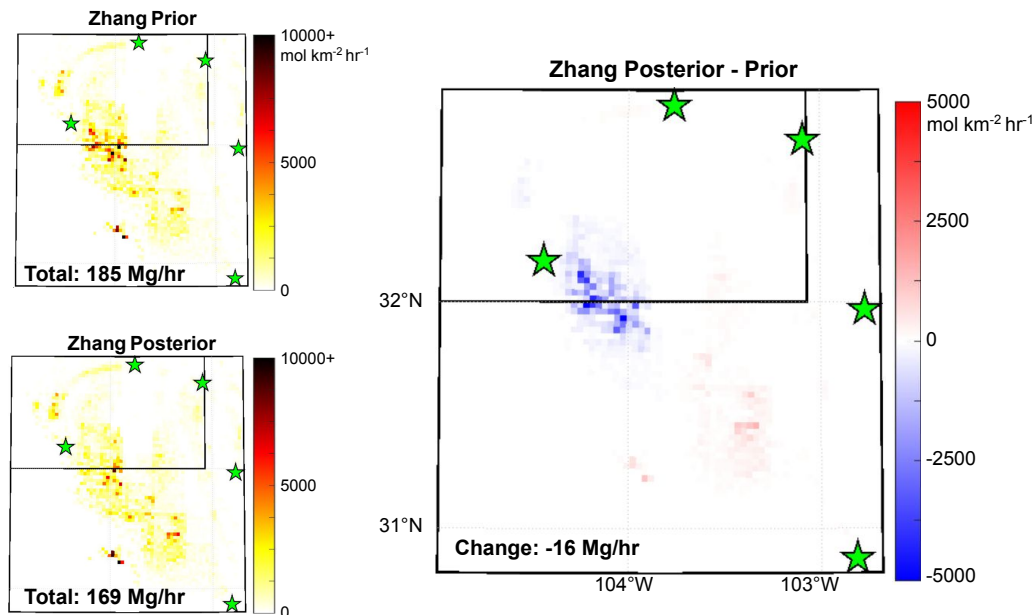

**Figure S18.** Prior, posterior, and difference between the Zhang prior and posterior maps for the Delaware domain, averaged across all months.

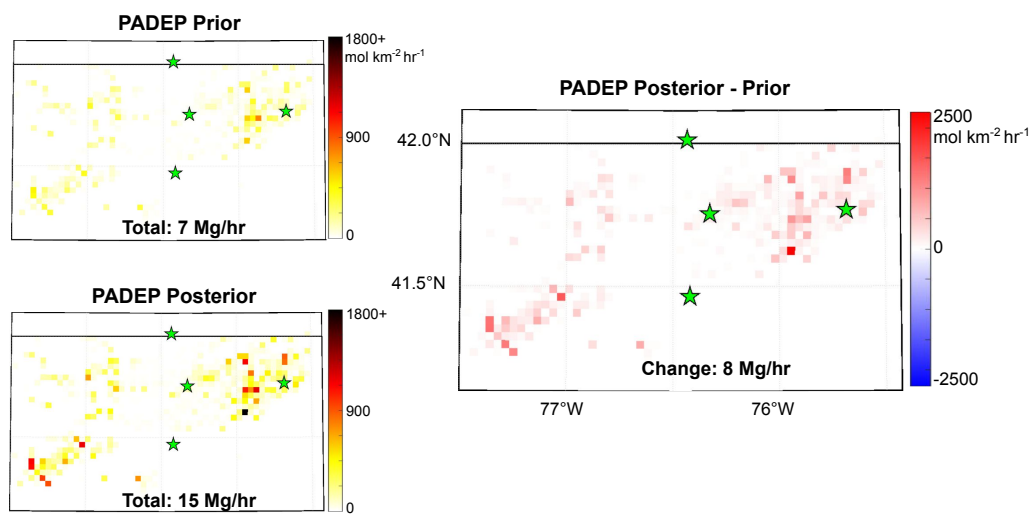

**Figure S19.** Prior, posterior, and difference between the Production-based prior and posterior maps for the Marcellus domain, averaged across all months.

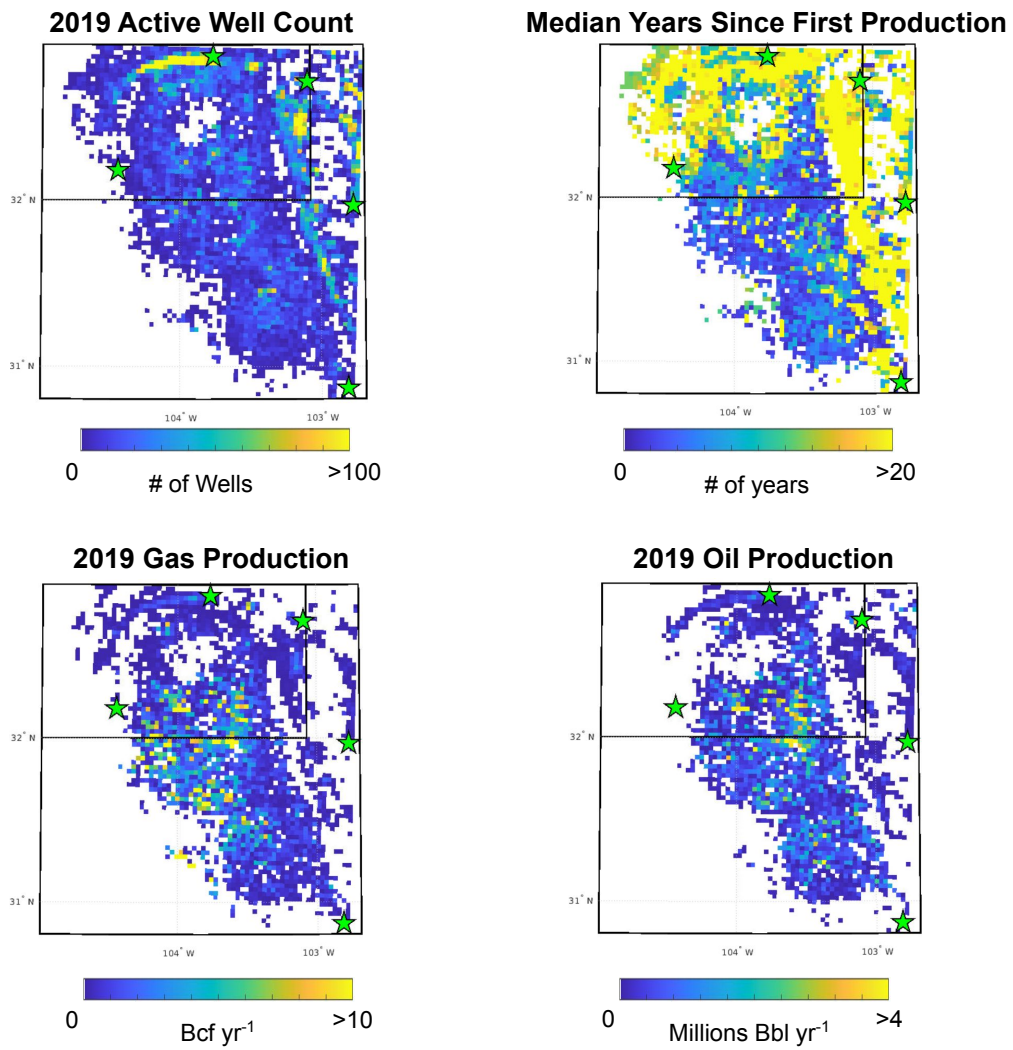

**Figure S20.** Well counts, median years since production, annual natural gas production, and annual oil production inside the Delaware study domain for the year 2019. Values are aggregated at 3 x 3 km resolution matching the model grid information from this study.

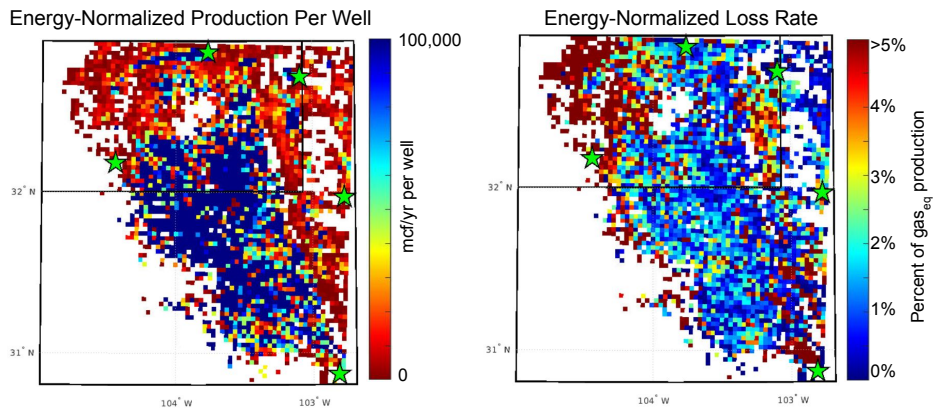

**Figure S21.** (left) Energy-normalized average production per well in each 3 x 3 km grid of the study domain. 1 barrel of oil = 7 mcf of gas produced assuming a methane composition of 80% in the Delaware basin. (right) Average energy-normalized loss rates in the study domain based on the  $EI_{ME}$  posterior.

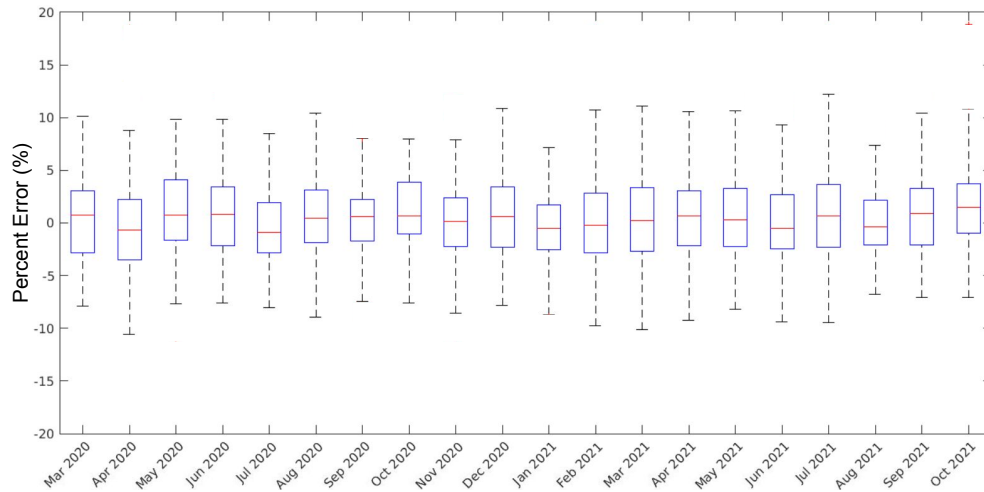

**Figure S22.** Box plot from the OSSE experiment in the Delaware basin showing the range of errors of the monthly posterior emission rates compared to the true mean monthly emission rate over the course of 100 simulations.

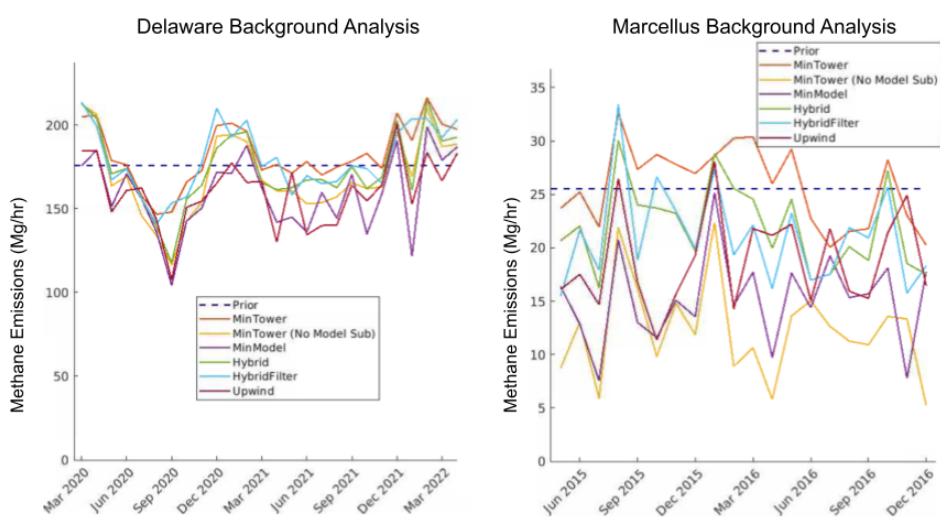

**Figure S23.** Posterior timeseries of monthly emission rates for the Delaware and Marcellus basins using the various background selection methodologies outlined in supplemental section 2. For the Delaware, the prior used was the  $EI_{ME}$ . For the Marcellus, the prior used was the Production-based prior.

| DELAWARE                               |                 |             |                               |                           | MARCELLUS                              |             |                         |                           |                                       |
|----------------------------------------|-----------------|-------------|-------------------------------|---------------------------|----------------------------------------|-------------|-------------------------|---------------------------|---------------------------------------|
|                                        | $EI_{ME}$ Prior | Zhang Prior | $EI_{ME}$ Posterior (Default) | Zhang Posterior (Default) |                                        | PADEP Prior | Production-Scaled Prior | PADEP Posterior (Default) | Production-Scaled Posterior (Default) |
| Mean Total O&G Emissions (Mg/hr)       | 176             | 185         | 174                           | 172                       | Mean Total O&G Emissions (Mg/hr)       | 7           | 25                      | 14                        | 22                                    |
| Mean Absolute Error (ppb)              | 46              | 55          | 41                            | 46                        | Mean Absolute Error (ppb)              | 15          | 18                      | 11                        | 11                                    |
| Model Bias (Model - Obs ) (ppb)        | -21             | -20         | -20                           | -28                       | Model Bias (Model - Obs ) (ppb)        | -11         | 3                       | -4                        | -3                                    |
| Correlation of Model, Obs Enhancements | 0.49            | 0.46        | 0.60                          | 0.58                      | Correlation of Model, Obs Enhancements | 0.37        | 0.44                    | 0.66                      | 0.74                                  |

**Table S1.** (left) Table describing the performance of the monthly posterior emission maps using the default settings relative to the priors for the Delaware basin. (right) Same as left, but for the northeast Marcellus basin.

|                                        | $EI_{ME}$ Prior | $EI_{ME}$ Posterior (Default) | $EI_{ME}$ Posterior (Prior x 1.5) | $EI_{ME}$ Posterior (Prior x 0.5) | $EI_{ME}$ Posterior (Early Hours) | $EI_{ME}$ Posterior (Flux Error x2) | $EI_{ME}$ Posterior (10 km correlation) | $EI_{ME}$ Posterior (Alternative Background) |
|----------------------------------------|-----------------|-------------------------------|-----------------------------------|-----------------------------------|-----------------------------------|-------------------------------------|-----------------------------------------|----------------------------------------------|
| Mean O&G Emissions (Mg/hr)             | 176             | 174                           | 210                               | 146                               | 160                               | 178                                 | 178                                     | 160                                          |
| Mean Absolute Error (ppb)              | 46              | 41                            | 37                                | 38                                | 48                                | 37                                  | 40                                      | 47                                           |
| Model Bias (Model - Obs ) (ppb)        | -21             | -20                           | -12                               | -19                               | -23                               | -16                                 | -18                                     | -7                                           |
| Correlation of Model, Obs Enhancements | 0.49            | 0.60                          | 0.68                              | 0.68                              | 0.60                              | 0.68                                | 0.63                                    | 0.51                                         |

**Table S2.** Table describing the performance of the monthly posterior emission maps for the Delaware basin created using the various methods described in Section S1 using the  $EI_{ME}$  prior.

|                                        | Zhang Prior | Zhang Posterior (Default) | Zhang Posterior (Prior x 1.5) | Zhang Posterior (Prior x 0.5) | Zhang Posterior (Early Hours) | Zhang Posterior (Flux Error x2) | Zhang Posterior (10 km correlation) | Zhang Posterior (Alternative Background) |
|----------------------------------------|-------------|---------------------------|-------------------------------|-------------------------------|-------------------------------|---------------------------------|-------------------------------------|------------------------------------------|
| Mean O&G Emissions (Mg/hr)             | 185         | 172                       | 219                           | 146                           | 156                           | 183                             | 177                                 | 156                                      |
| Mean Absolute Error (ppb)              | 55          | 46                        | 41                            | 43                            | 54                            | 41                              | 44                                  | 52                                       |
| Model Bias (Model - Obs) (ppb)         | -20         | -28                       | -19                           | -29                           | -31                           | -24                             | -27                                 | -15                                      |
| Correlation of Model, Obs Enhancements | 0.46        | 0.58                      | 0.65                          | 0.65                          | 0.57                          | 0.65                            | 0.61                                | 0.48                                     |

**Table S3.** Table describing the performance of the monthly posterior emission maps for the Delaware basin created using the various methods described in Section S1 using the Zhang prior.

|                                        | Production Prior | Production Posterior (Default) | Production Posterior (Prior x 1.5) | Production Posterior (Prior x 0.5) | Production Posterior (Early Hours) | Production Posterior (Flux Error x2) | Production Posterior (10 km correlation) | Production Posterior (Alternative Background) | Production Posterior (All Sources Solved) |
|----------------------------------------|------------------|--------------------------------|------------------------------------|------------------------------------|------------------------------------|--------------------------------------|------------------------------------------|-----------------------------------------------|-------------------------------------------|
| Mean O&G Emissions (Mg/hr)             | 25               | 22                             | 28                                 | 19                                 | 21                                 | 23                                   | 22                                       | 20                                            | 22                                        |
| Mean Absolute Error (ppb)              | 18               | 11                             | 9                                  | 9                                  | 14                                 | 9                                    | 11                                       | 13                                            | 11                                        |
| Model Bias (Model - Obs) (ppb)         | 3                | -3                             | -3                                 | -2                                 | -4                                 | -2                                   | -3                                       | -1                                            | -3                                        |
| Correlation of Model, Obs Enhancements | 0.44             | 0.74                           | 0.80                               | 0.80                               | 0.71                               | 0.81                                 | 0.74                                     | 0.69                                          | 0.76                                      |

**Table S4.** Table describing the performance of the monthly posterior emission maps for the Marcellus basin created using the various methods described in Section S1 using the Production-based prior.

|                                        | PADEP Prior | PADEP Posterior (Default) | PADEP Posterior (Prior x 1.5) | PADEP Posterior (Prior x 0.5) | PADEP Posterior (Early Hours) | PADEP Posterior (Flux Error x2) | PADEP Posterior (10 km correlation) | PADEP Posterior (Alternative Background) | PADEP Posterior (All Sources Solved) |
|----------------------------------------|-------------|---------------------------|-------------------------------|-------------------------------|-------------------------------|---------------------------------|-------------------------------------|------------------------------------------|--------------------------------------|
| Mean O&G Emissions (Mg/hr)             | 7           | 14                        | 19                            | 16                            | 13                            | 18                              | 17                                  | 12                                       | 13                                   |
| Mean Absolute Error (ppb)              | 15          | 11                        | 9                             | 9                             | 13                            | 9                               | 11                                  | 13                                       | 10                                   |
| Model Bias (Model - Obs ) (ppb)        | -11         | -4                        | -2                            | -3                            | -5                            | -3                              | -3                                  | -2                                       | -3                                   |
| Correlation of Model, Obs Enhancements | 0.37        | 0.66                      | 0.75                          | 0.75                          | 0.66                          | 0.75                            | 0.67                                | 0.64                                     | 0.72                                 |

**Table S5.** Table describing the performance of the monthly posterior emission maps for the Marcellus basin created using the various methods described in Section S1 using the PADEP prior.

|                                               | $EI_{ME}$ Prior | $EI_{ME}$ Posterior (Default) | OSSE Posterior (min max) |
|-----------------------------------------------|-----------------|-------------------------------|--------------------------|
| <b>Mean Total O&amp;G Emissions (Mg/hr)</b>   | 176             | 174                           | 176-176                  |
| <b>Mean Absolute Error (ppb)</b>              | 46              | 41                            | 4-7                      |
| <b>Model Bias (Model - Obs ) (ppb)</b>        | -21             | -20                           | (-1)-1                   |
| <b>Correlation of Model, Obs Enhancements</b> | 0.49            | 0.60                          | 0.85-0.98                |

**Table S6.** Table describing the performance of the monthly posterior emission maps for the 100 OSSE-based inversions investigating the effects of intermittent emitters on error in the inverse solution. The range of values show the minimum and maximum values from the 100 simulations. The low mean absolute error, low bias, and high correlation in all cases relative to the real-world inversion show that intermittent sources do not explain the errors and biases we see using real observations.



### Delaware Background Analysis

|                                     | MinTower | MinTower<br>(no model subtraction) | MinModel | Hybrid | Hybrid Filter | Upwind |
|-------------------------------------|----------|------------------------------------|----------|--------|---------------|--------|
| Available Days                      | 782      | 782                                | 782      | 782    | 554           | 716    |
| Mean Background Mole Fraction (ppb) | 1955     | 1973                               | 1982     | 1967   | 1965          | 1980   |
| Background 15 Day STD (ppb)         | 38       | 41                                 | 62       | 41     | 37            | 56     |
| Posterior Flux (Mg/hr)              | 182      | 170                                | 159      | 174    | 180           | 160    |
| Correlation                         | 0.55     | 0.58                               | 0.51     | 0.60   | 0.65          | 0.51   |
| MAE (ppb)                           | 47       | 38                                 | 47       | 41     | 37            | 47     |
| Bias (ppb)                          | -33      | -19                                | -5       | -20    | -21           | -7     |

**Table S7.** Inversion posterior statistics for the Delaware basin ( $EI_{ME}$  prior) using different background methods described in section S1.2. Available Days is the number of days with a calculable background using the specified methodology. Mean Background Mole Fraction describes the mean calculated background value across all available days for each method. Background 15 Day STD is the mean of a 15 day rolling standard deviation. Remaining rows are similar to those reported in previous tables, providing information on the performance of the posterior model enhancements relative to observations.

### Marcellus Background Analysis

|                                     | MinTower | MinTower<br>(no model subtraction) | MinModel | Hybrid | Hybrid Filter | Upwind |
|-------------------------------------|----------|------------------------------------|----------|--------|---------------|--------|
| Available Days                      | 531      | 531                                | 531      | 531    | 311           | 385    |
| Mean Background Mole Fraction (ppb) | 1928     | 1953                               | 1943     | 1938   | 1939          | 1945   |
| Background 15 Day STD (ppb)         | 27       | 26                                 | 28       | 25     | 25            | 29     |
| Posterior Flux (Mg/hr)              | 26       | 12                                 | 15       | 22     | 21            | 19     |
| Correlation                         | 0.56     | 0.65                               | 0.71     | 0.74   | 0.73          | 0.69   |
| MAE (ppb)                           | 18       | 12                                 | 13       | 11     | 10            | 13     |
| Bias (ppb)                          | -10      | 2                                  | 1        | 3      | 2             | 1      |

**Table S8.** Same as Table S7 but for the Marcellus basin (using the Production-based prior)
